# Supplementary material
Source: PubMed Central journal article supplement (PMC7289320)
Supplement: NIHMS1576766-supplement-1.pdf [file NIHMS1576766-supplement-1.pdf]

Figure S1

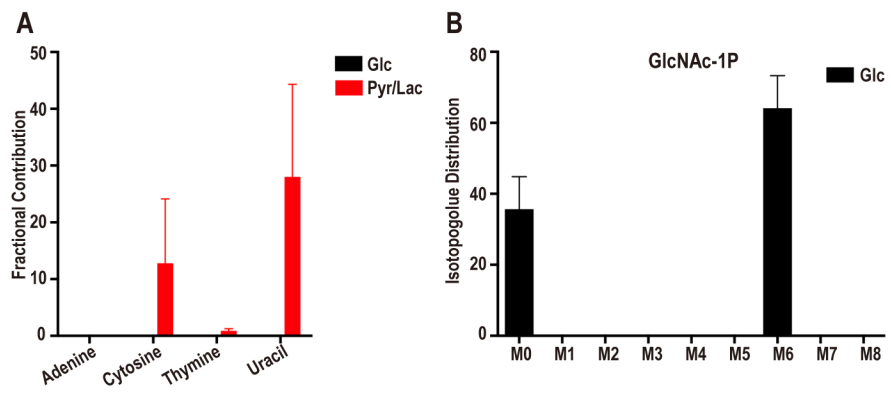

Figure S2

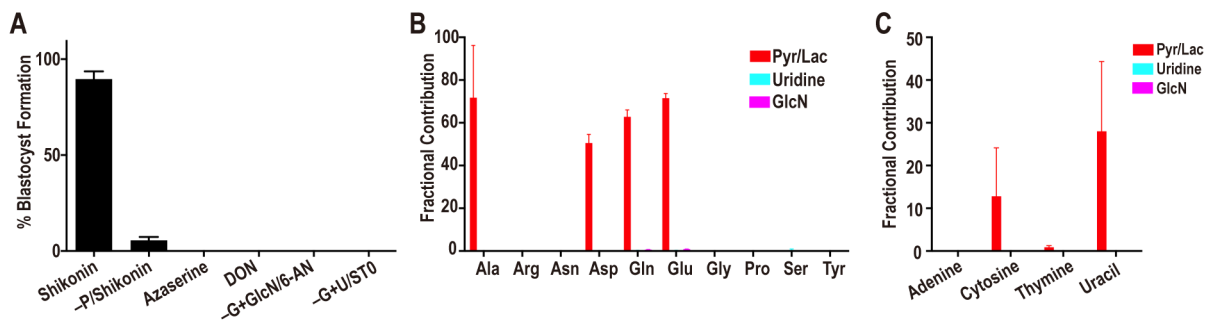

Fig S3

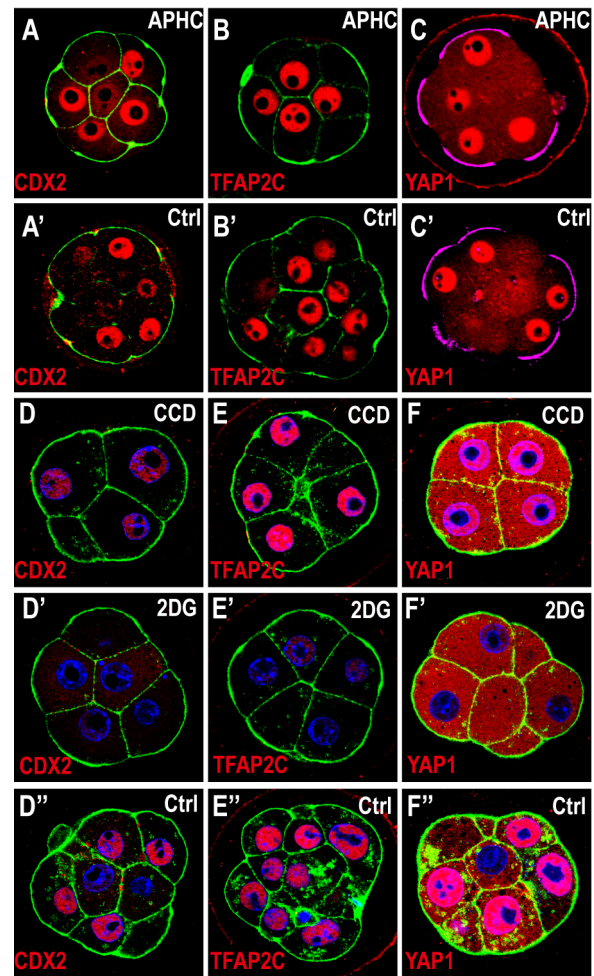

Figure S4

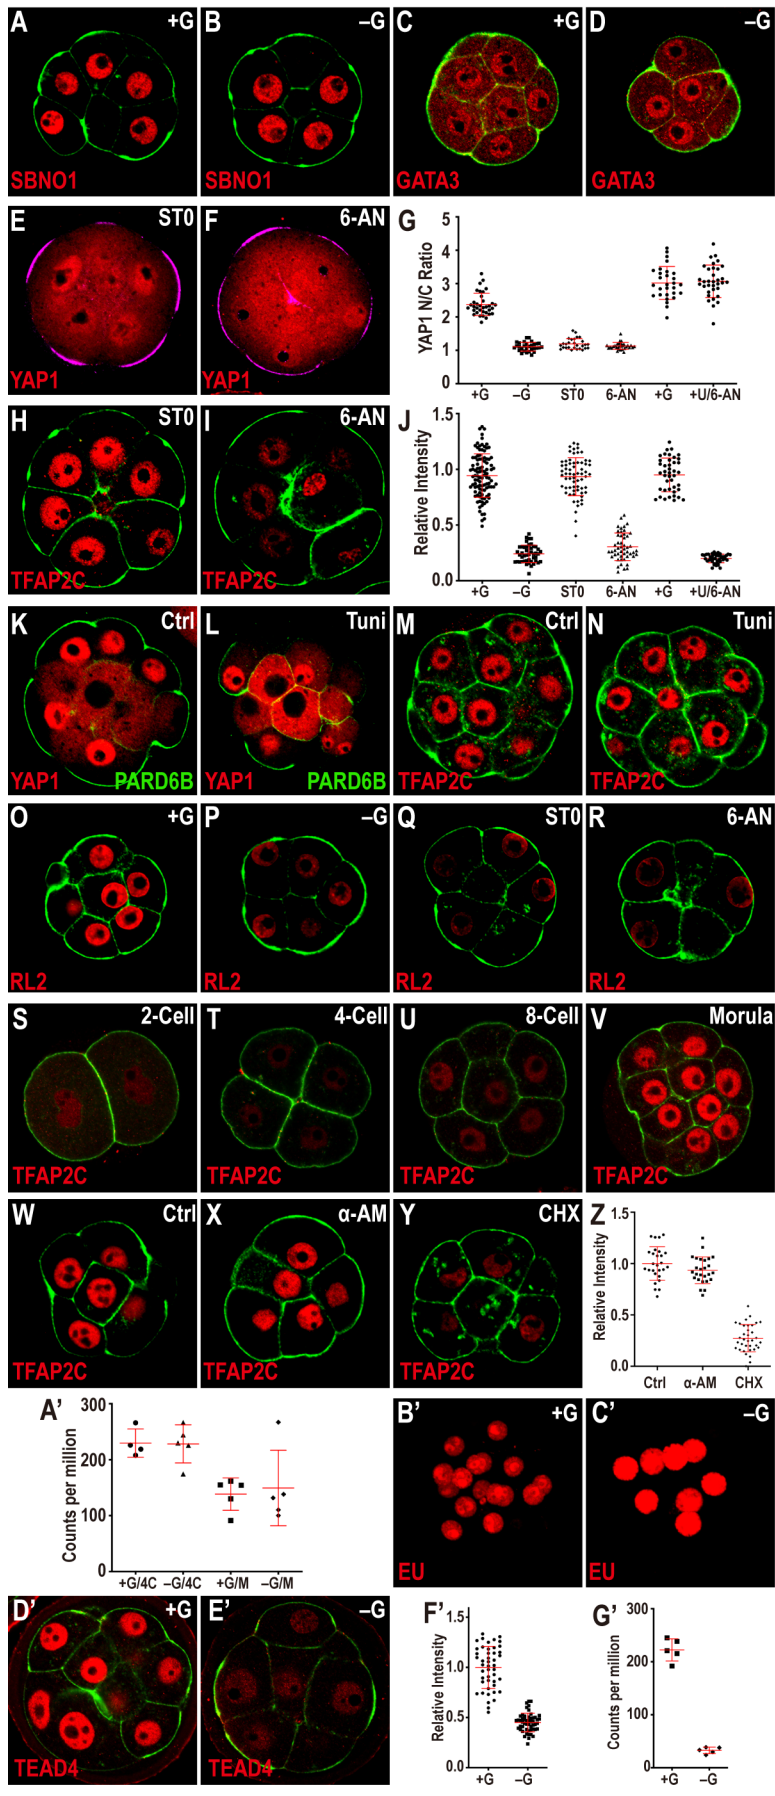

Figure S5

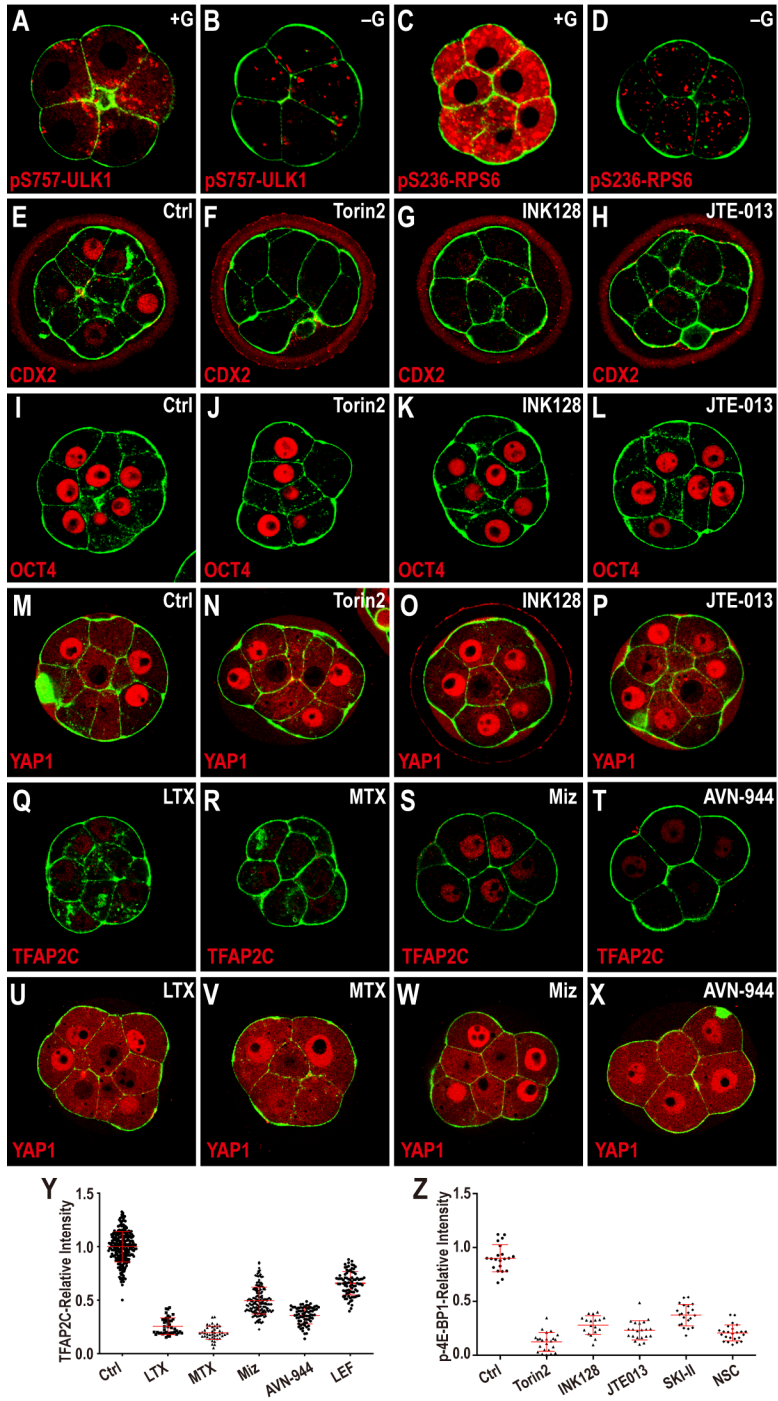

## Supplementary Figure Legends

### Figure S1. Metabolomic analysis of the compacted morula, related to Figure 2.

(A) Contribution of glucose and pyruvate/lactate to nucleobases. U-<sup>13</sup>C-glucose does not contribute carbon to either the purine bases (adenine) or to the pyrimidine bases (cytosine, uracil). In contrast, U-<sup>13</sup>C-pyruvate/lactate contribute to the pyrimidines, but not the purine bases. The nucleobases are generated from the breakdown of nucleotides, and their labeling pattern is an indirect read-out of the labeling of bases within the nucleotides.

(B) U-<sup>13</sup>C-glucose isotopologue distribution of HBP related metabolite GlcNAc-1P. The most abundant isotopologue is M6 in which 6 of the donated carbons are from exogenous (<sup>13</sup>C) glucose. M0 peak corresponds to unlabeled metabolites from internal resources.

### Figure S2. Metabolic contribution of glycolysis, PPP and HBP, related to Figure 3.

(A) Percentage of embryos that form blastocysts when cultured with added inhibitors or nutrient supplements. Inhibition of glycolysis (PKM2) by shikonin in +G has no adverse effect on blastocyst formation. However, in the absence of pyruvate (+G-P), shikonin blocks blastocyst formation. Inhibition of HBP by azaserine, or DON, both block the morula to blastocyst transition. Embryos cultured in medium containing GlcN in place of glucose remain sensitive to inhibition of the PPP by 6-AN. Uridine (U) does not rescue a block caused by inhibition of OGT by ST045849 (ST0).

(B) Metabolomic analysis shows that, unlike pyruvate/lactate (red), uridine (light blue) and GlcN (purple) do not contribute carbons to non-essential amino acids.

(C) As seen with glucose, labeled uridine and GlcN do not contribute carbon to nucleobase biosynthesis. In contrast, labeled pyruvate/lactate contribute carbon to pyrimidine base biosynthesis.

### **Figure S3. TE fate defect is not caused by 8-cell block, related to Figures 4 and 5.**

Cell membranes (green) are marked using phalloidin-FITC (**A, A', B, B', D-F'**), and apical surface (purple) are marked by pERM (**C, C'**). Aphidicolin (APHC) was added to the embryos at the early 8-cell stage (66h) to inhibit the DNA synthesis and cell cycle progression (**A-C**).

Cytochalasin D (CCD) was added to the embryos to inhibit cleavage (**D-F**).

At 78h control embryos are 8-16 cells and CDX2 (red) is expressed in the polar cells (**A', D''**).

APHC (**A**) and CCD (**D**) treated embryos are arrested at the 8-cell stage (78h), but have high levels of CDX2 expression.

APHC (**B**) and CCD (**E**) treated embryos have high levels of TFAP2C (red) that is similar to that seen in control embryos (**B', E''**).

YAP1 nuclear localization (red) in APHC (**C**) and CCD (**F**) treated embryos is similar to that seen in the polar cells of control embryos (**C', F''**).

(**D'-F'**) CDX2, TFAP2C and YAP1 are disrupted upon 2DG treatment.

### **Figure S4. Glucose dependent activation of transcription factors, related to Figure 5.**

Cell membranes (green) are marked using phalloidin-FITC, and apical surface are marked by pERM (purple in **E, F**) or PARD6B (green in **K, L**).

(**A-D**) Expression of SBNO1 (**A, B**) or GATA3 (**C, D**) in morula stage (78h) embryos is not dependent on exogenously provided glucose.

(**E-G**) PPP/HBP and YAP1 nuclear localization at compacted 8-cell stage (74h). In +G control (see Figure 5A) YAP1 is localized to the nucleus in pERM (purple) marked polar cells. Inhibition of O-glycosylation by ST045849 (**E**) or PPP by 6-AN (**F**) both give results similar to that of -G (see Figure 5B). (**G**) Quantitation of YAP1 nuclear to cytoplasmic (N/C) ratio at 74h, YAP1 data set at morula stage (78h) in Figure 5O, 5Q are also included.

(**H-J**) In control medium TFAP2C (red) is expressed in the nuclei of all blastomeres at morula stage (78h) (see Figure 5D). This expression is insensitive to O-linked glycosylation inhibition by ST045849 (**H**), but is lost when the PPP is inhibited by 6-AN (**I**). Quantitation shown in (**J**), TFAP2C quantitation in Figure 5R, 5T are also included.

**(K-N)** N-linked glycosylation and TE specification. Apical cells with high levels of PARD6B (green) on their membrane also show nuclear localization of YAP1 (red) **(K)**. Blocking N-glycosylation by tunicamycin (Tuni) treatment causes partial disruption in PARD6B apical localization **(L)**. Apical cells that have lost apical PARD6B do not express YAP1 in the nucleus, but in other apical cells that maintain PARD6B expression YAP1 is localized in the nucleus **(L)**. Tunicamycin treatment **(N)** does not influence the expression of TFAP2C **(M, N)**.

**(O-R)** O-linked glycosylation is glucose, HBP and PPP dependent. O-linked glycosylation is detected using the RL2 antibody and decreases in embryos grown without glucose **(P)**, or when O-linked glycosylation is inhibited by ST045849 **(Q)**, or when the PPP is inhibited using 6-AN **(R)**.

**(S-V)** TFAP2C expression during preimplantation development. TFAP2C expression is low at the 2-cell **(S)**, 4-cell **(T)**, and early 8-cell **(U)** stages, and then increases at the compacted morula **(V)** stage.

**(W-Z)** TFAP2C expression is sensitive to inhibition of translation. Blocking translation by cycloheximide (CHX) **(Y)**, but not transcription inhibition by  $\alpha$ -amanitin ( $\alpha$ -AM) **(X)** causes a reduction in nuclear TFAP2C levels. **(Z)** Quantitation of nuclear TFAP2C.

**(A')** *Tfap2c* mRNA (counts per million) levels are unchanged at 4-cell stage and morula stage when cultured in –G condition.

**(B', C')** –G **(C')** grown embryos do not incorporate decreased amounts of EU, which marks synthesis of nascent transcripts, compared embryos grown in +G medium **(B')**.

**(D'-G')** In control medium TEAD4 protein (red) is expressed in the nuclei of all blastomeres at morula stage (78h) **(D')**. This expression is lost in embryos grown in –G medium **(E')**.

Quantitation of TEAD4 protein level shown in **(F')**. **(G')** *Tead4* mRNA (counts per million) levels are significantly reduced, at the compacted 8-cell stage, in embryos grown in –G medium.

## **Figure S5. Activation of mTOR by glucose and S1P, related to Figure 6.**

Embryos were isolated at 18h and cultured in either +G or –G media until 78h, and inhibitors were added to the medium at 50h. Cell membranes are marked by phalloidin-FITC staining (green).



**(A-D)** mTOR target expression requires glucose. In control embryos high levels of pS757-ULK1 **(A)** or pS236-RPS6 **(C)** are seen at 78h. Embryos cultured in –G medium show a dramatic decrease in the levels of pS757-ULK1 **(B)** and pS236-RPS6 **(D)**.

**(E-H)** CDX2 expression is lost upon mTOR inhibition with Torin2 **(F)** and INK128 **(G)** and inhibition of S1P signaling by JTE-013 **(H)**.

**(I-P)** Inhibition of mTORC1 and S1P signaling does not perturb OCT4 and YAP1 expression. mTOR inhibition with Torin2 **(J, N)** and INK128 **(K, O)** and S1P signaling by JTE-013 **(L, P)** does not affect OCT4 **(I-L)** and YAP1 **(M-P)**.

**(Q-T)** Inhibition of purine synthesis decreases TFAP2C expression. The expression of TFAP2C is eliminated in the presence of purine synthesis inhibitors, lometrexol (LTX, **Q**), methotrexate (MTX, **R**), mizoribine (Miz, **S**) and AVN-944 **(T)**.

**(U-X)** Inhibition of purine synthesis does not perturb YAP1 expression. Purine synthesis inhibition with LTX **(U)**, MTX **(V)**, Miz **(W)** and AVN-944 **(X)** does not affect YAP1.

**(Y)** Quantitation of TFAP2C expression in embryos in which the purine synthesis is inhibited.

**(Z)** Quantitation of phosphorylation of 4E-BP1 in embryos in which the mTOR and S1P pathways are inhibited (the control data are shared with Figure 6D).
